# Supplementary material
Source: MDPI journal article supplement (https://www.mdpi.com/2072-4292/15/6/1694)
Supplement: s1 [file s1]

# A Comparison of UAV-Derived Dense Point Clouds Using LiDAR and NIR Photogrammetry in an Australian Eucalypt Forest

Megan Winsen \* and Grant Hamilton

**Table S1.** Default Open Drone Map pre-processing settings.

| Option                                | Default Setting | Option                         | Default Setting |
|---------------------------------------|-----------------|--------------------------------|-----------------|
| pc-classify                           | off             | mesh-octree-depth              | 10              |
| orthophoto-png                        | off             | matcher-distance               | 0               |
| smrf-scalar                           | 1.25            | split-overlap                  | 150             |
| opensfm-depthmap-min-patch-sd         | 1               | optimize-disk-space            | off             |
| smrf-window                           | 18              | dec-decimation                 | 1               |
| feature-type                          | sift            | orthophoto-cutline             | off             |
| sm-cluster                            | None            | pc-filter                      | 2.5             |
| min-num-features                      | 8000            | split                          | 999999          |
| resize-to                             | 2048            | fast-orthophoto                | off             |
| smrf-slope                            | 0.15            | pc-ept                         | off             |
| rerun-from                            | blank           | crop                           | 3               |
| split-multitracks                     | off             | pc-las                         | off             |
| pc-sample                             | 0               | merge                          | all             |
| use-3dmesh                            | off             | gps-accuracy                   | 15              |
| mve-confidence                        | 0.6             | dsm                            | off             |
| radiometric-calibration               | none            | dem-gapfill-steps              | 3               |
| texturing-skip-hole-filling           | off             | mesh-point-weight              | 4               |
| texturing-outlier-removal-type        | gauss_clamping  | max-concurrency                | 4               |
| orthophoto-resolution                 | 5               | texturing-tone-mapping         | none            |
| dtm                                   | off             | cameras (json)                 | blank           |
| orthophoto-no-tiled                   | off             | dem-euclidean-map              | off             |
| dem-resolution                        | 5               | camera-lens                    | auto            |
| mesh-size                             | 200000          | skip-3dmodel                   | off             |
| force-gps                             | off             | matcher-neighbors              | 8               |
| orthophoto-compression                | deflate         | pc-csv                         | off             |
| ignore-gsd                            | off             | end-with                       | odm_report      |
| build-overviews                       | off             | depthmap-resolution            | 640             |
| use-opensfm-dense                     | off             | texturing-data-term            | gmi             |
| opensfm-depthmap-min-consistent-views | 3               | texturing-skip-visibility-test | off             |
| texturing-skip-local-seam-levelling   | off             | opensfm-depthmap-method        | PATCH_MATCH     |
| texturing-keep-unseen-faces           | off             | use-fixed-camera-params        | off             |
| debug                                 | off             | smrf-threshold                 | 0.5             |
| use-exif                              | off             | verbose                        | off             |
| mesh-samples                          | 1               | use-hybrid-bundle-adjustment   | off             |
| pc-rectify                            | off             |                                |                 |

**Table S2.** Full dataset for CPC and CHM point density at field data collection points (n=84).

| Transect | Distance<br>(m) | Field | SfM-NIR Point Density |         | LiDAR Point Density |         |
|----------|-----------------|-------|-----------------------|---------|---------------------|---------|
|          |                 | CPC   | Mean                  | SD      | Mean                | SD      |
| 1        | 0               | 0.15  | 0.0000                | 0.0000  | 0.7722              | 1.8346  |
| 1        | 5               | 0.16  | 0.0000                | 0.0000  | 7.3718              | 7.8022  |
| 1        | 10              | 0.37  | 0.0789                | 0.3147  | 58.3067             | 28.6189 |
| 1        | 15              | 0.61  | 3.1169                | 2.4440  | 78.9250             | 37.8480 |
| 1        | 20              | 0.3   | 9.1282                | 9.4018  | 7.8734              | 10.3647 |
| 1        | 25              | 0.22  | 0.0000                | 0.0000  | 0.0000              | 0.0000  |
| 1        | 30              | 0.39  | 0.3797                | 1.4258  | 0.6835              | 1.8863  |
| 1        | 35              | 0.5   | 6.4744                | 7.8622  | 36.2208             | 16.3426 |
| 1        | 40              | 0.31  | 2.4304                | 3.4151  | 24.4737             | 14.5190 |
| 1        | 45              | 0.4   | 3.7792                | 2.9657  | 44.3590             | 18.2518 |
| 1        | 50              | 0.4   | 0.0270                | 0.1622  | 0.2821              | 1.2999  |
| 1        | 55              | 0.51  | 2.3418                | 4.0154  | 7.0125              | 6.8657  |
| 1        | 60              | 0.45  | 18.3924               | 6.4148  | 21.3205             | 9.1686  |
| 1        | 65              | 0.37  | 10.4051               | 7.4043  | 17.7692             | 7.7293  |
| 1        | 70              | 0.47  | 0.0000                | 0.0000  | 21.8442             | 19.1407 |
| 1        | 75              | 0.29  | 0.2105                | 0.6138  | 18.7067             | 11.1747 |
| 1        | 80              | 0.37  | 3.0390                | 4.0338  | 16.7500             | 16.8408 |
| 1        | 85              | 0.62  | 0.8590                | 1.2375  | 24.4937             | 15.9023 |
| 1        | 90              | 0.41  | 0.0000                | 0.0000  | 43.9747             | 21.7442 |
| 1        | 95              | 0.46  | 0.1000                | 0.3742  | 23.2500             | 13.8252 |
| 1        | 100             | 0.43  | 1.7051                | 3.3783  | 39.4805             | 27.7286 |
| 2        | 0               | 0.7   | 22.9872               | 5.3768  | 23.6582             | 7.6454  |
| 2        | 5               | 0.44  | 0.0375                | 0.1900  | 18.4375             | 13.0813 |
| 2        | 10              | 0.38  | 1.1266                | 2.3566  | 59.8442             | 21.3937 |
| 2        | 15              | 0.35  | 2.5443                | 2.1216  | 23.7750             | 11.6758 |
| 2        | 20              | 0.19  | 10.8000               | 7.1910  | 25.8875             | 13.6400 |
| 2        | 25              | 0.28  | 0.0000                | 0.0000  | 0.0000              | 0.0000  |
| 2        | 30              | 0.37  | 16.5443               | 12.3522 | 20.8462             | 11.5360 |
| 2        | 35              | 0.62  | 21.4872               | 16.1418 | 26.3125             | 12.1744 |
| 2        | 40              | 0.39  | 11.4156               | 9.6811  | 24.3544             | 11.4073 |
| 2        | 45              | 0.34  | 12.7051               | 10.1856 | 34.4430             | 14.3842 |
| 2        | 50              | 0.53  | 0.0128                | 0.1125  | 6.0250              | 9.1964  |
| 2        | 55              | 0.37  | 15.4935               | 8.9073  | 27.1795             | 12.7829 |
| 2        | 60              | 0.22  | 2.1013                | 3.0795  | 28.1899             | 17.4197 |
| 2        | 65              | 0.26  | 0.0000                | 0.0000  | 0.0000              | 0.0000  |
| 2        | 70              | 0.48  | 0.3247                | 1.0375  | 4.5974              | 7.7882  |
| 2        | 75              | 0.45  | 1.9605                | 4.3602  | 28.9487             | 25.5724 |
| 2        | 80              | 0.48  | 3.2192                | 4.2563  | 16.7532             | 10.2046 |
| 2        | 85              | 0.41  | 1.5513                | 2.2851  | 8.9870              | 4.8523  |
| 2        | 90              | 0.41  | 1.2564                | 2.4360  | 50.1646             | 22.9178 |
| 2        | 95              | 0.37  | 0.0000                | 0.0000  | 32.9730             | 19.5800 |

|   |     |      |         |         |         |         |
|---|-----|------|---------|---------|---------|---------|
| 2 | 100 | 0.36 | 0.6709  | 1.1770  | 75.5455 | 17.8526 |
| 3 | 0   | 0.4  | 0.5570  | 1.0031  | 30.0385 | 11.4382 |
| 3 | 5   | 0.45 | 9.0649  | 11.3759 | 15.6835 | 14.4910 |
| 3 | 10  | 0.37 | 0.4459  | 1.0285  | 41.6410 | 14.9022 |
| 3 | 15  | 0.38 | 0.0000  | 0.0000  | 6.3919  | 7.9403  |
| 3 | 20  | 0.24 | 5.1392  | 7.3014  | 16.1410 | 13.8070 |
| 3 | 25  | 0.22 | 1.1875  | 2.0802  | 16.0759 | 14.1115 |
| 3 | 30  | 0.28 | 0.0000  | 0.0000  | 0.0000  | 0.0000  |
| 3 | 35  | 0.33 | 0.3671  | 1.4771  | 17.2821 | 15.5563 |
| 3 | 40  | 0.57 | 0.6835  | 2.3576  | 29.1772 | 24.9662 |
| 3 | 45  | 0.45 | 1.4359  | 2.0791  | 60.7089 | 23.7605 |
| 3 | 50  | 0.51 | 0.5063  | 1.0296  | 60.6923 | 21.4663 |
| 3 | 55  | 0.36 | 19.4474 | 9.8721  | 25.7564 | 12.5168 |
| 3 | 60  | 0.55 | 0.0000  | 0.0000  | 0.0000  | 0.0000  |
| 3 | 65  | 0.37 | 3.0909  | 3.2720  | 12.6538 | 9.8056  |
| 3 | 70  | 0.35 | 2.1538  | 2.9875  | 5.0909  | 6.4991  |
| 3 | 75  | 0.56 | 6.0390  | 4.5994  | 23.9615 | 10.5581 |
| 3 | 80  | 0.29 | 1.4615  | 2.0859  | 17.6494 | 7.2806  |
| 3 | 85  | 0.27 | 0.8395  | 1.8755  | 33.5000 | 12.5899 |
| 3 | 90  | 0.29 | 21.3544 | 16.8200 | 28.1235 | 22.1217 |
| 3 | 95  | 0.38 | 20.1538 | 15.9760 | 43.2405 | 13.3731 |
| 3 | 100 | 0.47 | 5.8553  | 6.8915  | 15.5000 | 10.8009 |
| 4 | 0   | 0.53 | 2.4615  | 3.1853  | 62.5443 | 23.6995 |
| 4 | 5   | 0.37 | 0.0000  | 0.0000  | 0.1410  | 0.6350  |
| 4 | 10  | 0.26 | 0.0000  | 0.0000  | 0.0000  | 0.0000  |
| 4 | 15  | 0.29 | 9.3924  | 13.0077 | 20.3580 | 18.2007 |
| 4 | 20  | 0.3  | 0.0000  | 0.0000  | 3.4359  | 6.1302  |
| 4 | 25  | 0.37 | 5.2692  | 4.9502  | 36.6250 | 16.8474 |
| 4 | 30  | 0.3  | 2.4156  | 2.4619  | 38.2658 | 16.2479 |
| 4 | 35  | 0.43 | 0.4810  | 0.9919  | 33.2338 | 21.1561 |
| 4 | 40  | 0.38 | 0.2597  | 0.8739  | 16.9872 | 12.5723 |
| 4 | 45  | 0.61 | 14.4359 | 11.5110 | 22.2436 | 10.0730 |
| 4 | 50  | 0.45 | 0.0000  | 0.0000  | 2.0875  | 4.2077  |
| 4 | 55  | 0.45 | 1.8228  | 6.8228  | 2.0128  | 4.0494  |
| 4 | 60  | 0.51 | 2.8205  | 3.6082  | 31.5897 | 21.8945 |
| 4 | 65  | 0.25 | 13.0541 | 4.4748  | 37.6753 | 15.8716 |
| 4 | 70  | 0.29 | 0.0000  | 0.0000  | 2.9091  | 7.9678  |
| 4 | 75  | 0.42 | 25.4103 | 18.1655 | 24.7564 | 9.4234  |
| 4 | 80  | 0.26 | 16.8608 | 9.4638  | 22.7403 | 8.4736  |
| 4 | 85  | 0.43 | 4.1975  | 6.2705  | 5.8875  | 8.9540  |
| 4 | 90  | 0.36 | 4.0260  | 5.6153  | 14.3205 | 11.2335 |
| 4 | 95  | 0.33 | 3.0897  | 5.1246  | 18.0641 | 15.2705 |
| 4 | 100 | 0.45 | 3.5195  | 4.0855  | 37.1266 | 17.7103 |

**Table S3.** Full dataset for field-measured and corresponding CHM heights (n=45).

| <b>Tree ID</b> | <b>Field-measured height (m)</b> | <b>SfM-NIR CHM height (m)</b> | <b>LiDAR CHM height (m)</b> | <b>Tree ID</b> | <b>Field-measured height (m)</b> | <b>SfM-NIR CHM height (m)</b> | <b>LiDAR CHM height (m)</b> |
|----------------|----------------------------------|-------------------------------|-----------------------------|----------------|----------------------------------|-------------------------------|-----------------------------|
| 1              | 30.54                            | 0.00                          | 29.69                       | 24             | 28.06                            | 0.00                          | 21.01                       |
| 2              | 37.32                            | 0.00                          | 26.24                       | 25             | 18.88                            | 0.00                          | 24.79                       |
| 3              | 15.28                            | 23.89                         | 24.63                       | 26             | 6.01                             | 12.80                         | 13.63                       |
| 4              | 17.65                            | 25.08                         | 26.23                       | 27             | 7.54                             | 15.02                         | 15.14                       |
| 5              | 12.69                            | 0.00                          | 24.62                       | 28             | 13.76                            | 0.00                          | 6.98                        |
| 6              | 9.05                             | 0.00                          | 25.80                       | 29             | 13.82                            | 0.00                          | 12.35                       |
| 7              | 12.73                            | 10.59                         | 11.43                       | 30             | 10.37                            | 0.00                          | 10.99                       |
| 8              | 8.64                             | 0.00                          | 0.00                        | 31             | 6.71                             | 16.66                         | 17.19                       |
| 9              | 10.22                            | 10.04                         | 15.72                       | 32             | 10.19                            | 0.00                          | 16.53                       |
| 10             | 13.24                            | 29.24                         | 29.64                       | 33             | 36.69                            | 27.70                         | 28.06                       |
| 11             | 38.44                            | 25.48                         | 25.39                       | 34             | 17.14                            | 26.17                         | 26.18                       |
| 12             | 11.55                            | 0.00                          | 17.95                       | 35             | 20.04                            | 0.00                          | 24.98                       |
| 13             | 7.43                             | 0.00                          | 23.73                       | 36             | 6.01                             | 23.41                         | 24.04                       |
| 14             | 10.17                            | 27.33                         | 28.84                       | 37             | 7.55                             | 12.25                         | 14.13                       |
| 15             | 19.51                            | 14.10                         | 13.56                       | 38             | 7.46                             | 0.00                          | 5.84                        |
| 16             | 8.56                             | 13.95                         | 12.99                       | 39             | 5.93                             | 0.00                          | 12.58                       |
| 17             | 17.13                            | 12.88                         | 17.50                       | 40             | 19.12                            | 19.43                         | 19.54                       |
| 18             | 9.08                             | 0.00                          | 10.53                       | 41             | 9.16                             | 16.56                         | 16.92                       |
| 19             | 5.36                             | 12.92                         | 14.49                       | 42             | 12.09                            | 11.47                         | 12.22                       |
| 20             | 6.50                             | 16.14                         | 17.29                       | 43             | 8.60                             | 20.72                         | 0.00                        |
| 21             | 4.28                             | 0.00                          | 11.04                       | 44             | 6.61                             | 0.00                          | 0.00                        |
| 22             | 11.85                            | 11.20                         | 11.88                       | 45             | 21.08                            | 0.00                          | 0.00                        |
| 23             | 38.38                            | 29.12                         | 30.93                       |                |                                  |                               |                             |
